# Supplementary material for: Systematic Profiling of Poly(A)+ Transcripts Modulated by Core 3’ End Processing and Splicing Factors Reveals Regulatory Rules of Alternative Cleavage and Polyadenylation
Source: PubMed Central journal article supplement (PMC4407891; doi:10.1371/journal.pgen.1005166), 2015-04-23

**Figure S2**

**A**

**Significance Analysis of Alternative Polyadenylation (SAAP)**

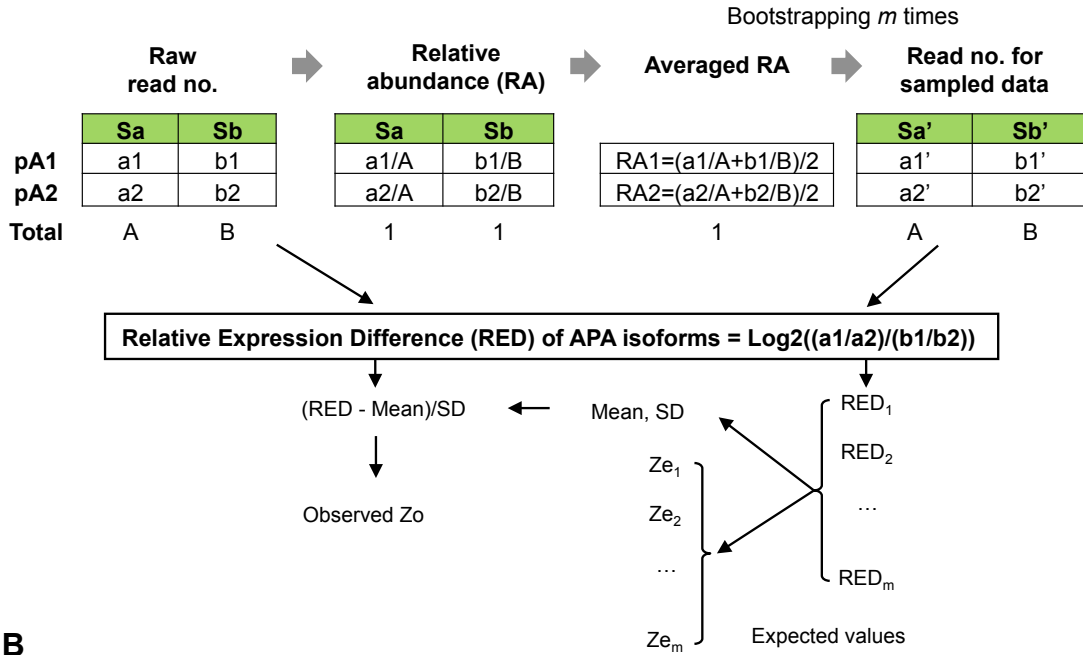

**B**

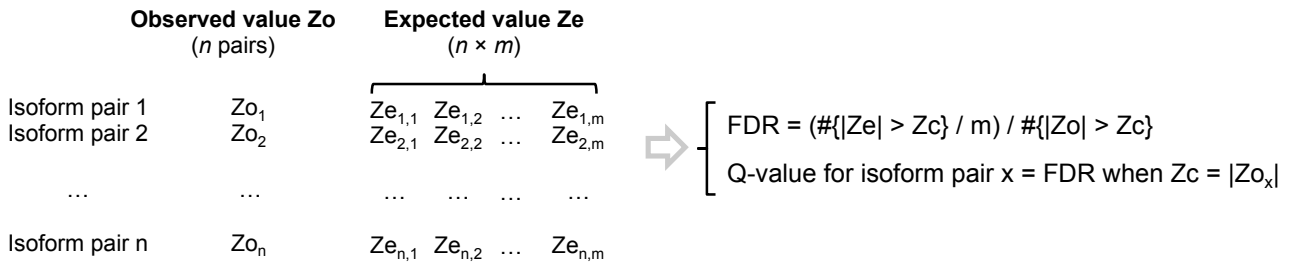

**C**

**Global Analysis of Alternative Polyadenylation (GAAP)**

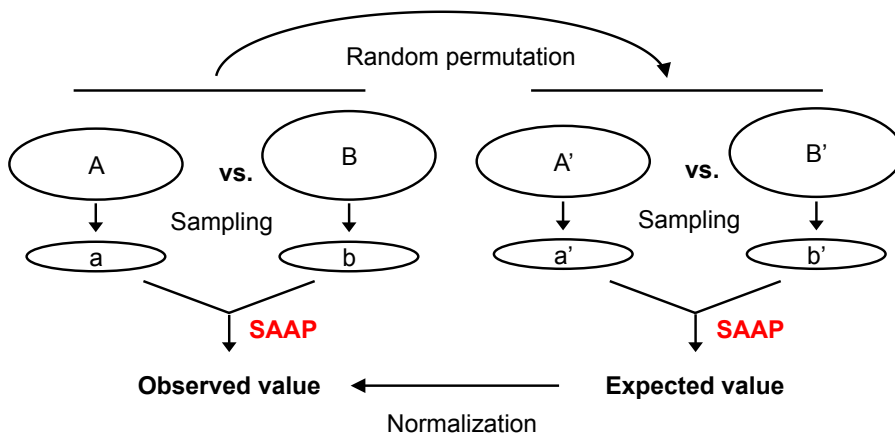

Supplement: pgen.1005166.s002.pdf [file pgen.1005166.s002.pdf]
