# Supplementary material for: Systematic Profiling of Poly(A)+ Transcripts Modulated by Core 3’ End Processing and Splicing Factors Reveals Regulatory Rules of Alternative Cleavage and Polyadenylation
Source: PubMed Central journal article supplement (PMC4407891; doi:10.1371/journal.pgen.1005166), 2015-04-23

**Figure S5**

**A**

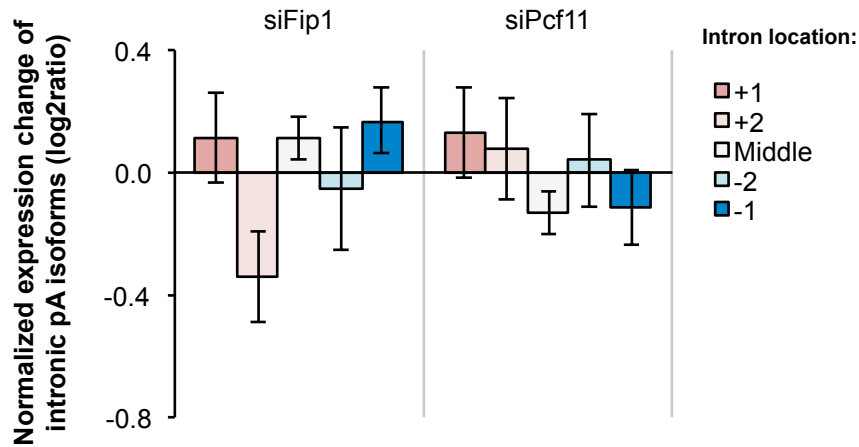

**B**

| Sample  | Intron size |    |   |    |    | 5'SS strength |    |   |    |    | 3'SS strength |    |   |    |    |
|---------|-------------|----|---|----|----|---------------|----|---|----|----|---------------|----|---|----|----|
|         | +1          | +2 | M | -2 | -1 | +1            | +2 | M | -2 | -1 | +1            | +2 | M | -2 | -1 |
| siFip1  | 0           | -1 | 0 | -1 | 0  | 0             | 0  | 0 | 1  | 0  | 0             | 0  | 1 | 0  | 0  |
| siPcf11 | 3           | 0  | 0 | 1  | 0  | 1             | 0  | 1 | 0  | 0  | 1             | 0  | 1 | 0  | 0  |

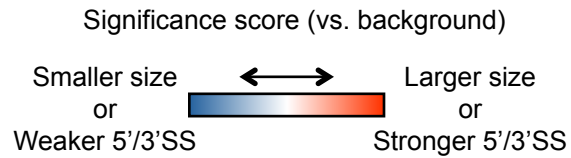

Supplement: pgen.1005166.s005.pdf [file pgen.1005166.s005.pdf]
