# Supplementary material for: Systematic Profiling of Poly(A)+ Transcripts Modulated by Core 3’ End Processing and Splicing Factors Reveals Regulatory Rules of Alternative Cleavage and Polyadenylation
Source: PubMed Central journal article supplement (PMC4407891; doi:10.1371/journal.pgen.1005166), 2015-04-23

# Figure S7

**A**

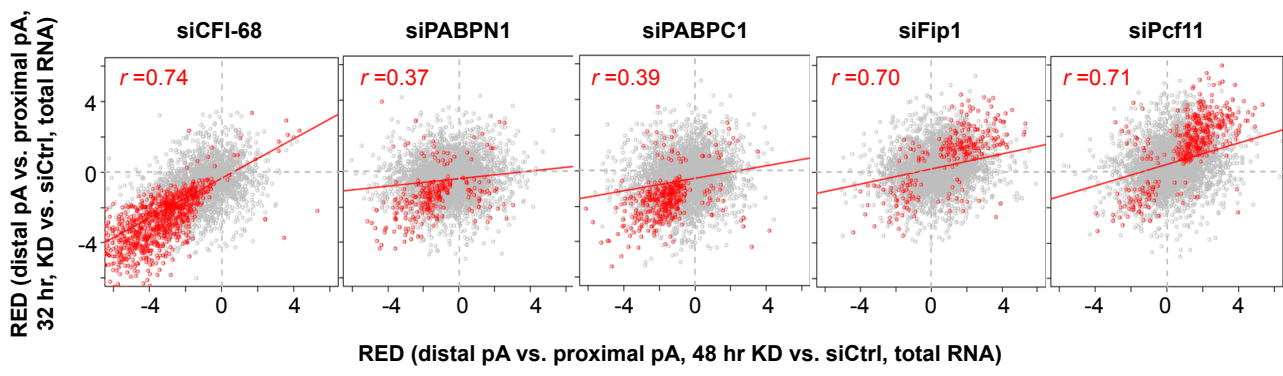

○ Genes with significant APA in both samples  
○ Other genes

**B**

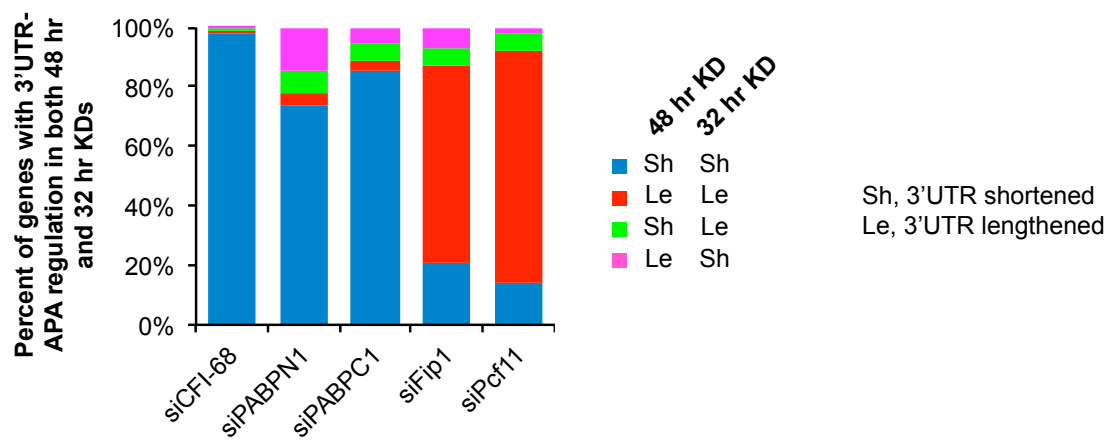

Supplement: pgen.1005166.s007.pdf [file pgen.1005166.s007.pdf]
