# Supplementary material for: Systematic Profiling of Poly(A)+ Transcripts Modulated by Core 3’ End Processing and Splicing Factors Reveals Regulatory Rules of Alternative Cleavage and Polyadenylation
Source: PubMed Central journal article supplement (PMC4407891; doi:10.1371/journal.pgen.1005166), 2015-04-23
Supplement: pgen.1005166.s018.pdf [file pgen.1005166.s018.pdf]

|      |    |    |    |    |                                        |
|------|----|----|----|----|----------------------------------------|
| TGTA | -1 | -1 | 1  | 1  | Proximal_pA.sICFI68-100-41.Shortened   |
| TTTT | 0  | 0  | 0  | 0  | Proximal_pA.sICFI68-100-41.Lengthened  |
| TAAA | 4  | 4  | 1  | 1  | Proximal_pA.sICFI68-40-1.Shortened     |
| TTTA | 0  | 0  | 0  | 0  | Proximal_pA.sICFI68-40-1.Lengthened    |
| TATT | -1 | -1 | 1  | 1  | Proximal_pA.sICFI68-40-1.Shortened     |
| CCTC | 1  | 1  | 1  | 1  | Proximal_pA.sICFI68-40-1.Lengthened    |
| CTCC | 1  | 1  | 1  | 1  | Distal_pA.sICFI68-100-41.Shortened     |
| AATA | -2 | -1 | 0  | 0  | Distal_pA.sICFI68-100-41.Lengthened    |
| ATAA | 6  | 6  | 1  | 1  | Distal_pA.sICFI68-40-1.Shortened       |
| TTGT | -1 | -1 | 0  | 0  | Distal_pA.sICFI68-40-1.Lengthened      |
| CCCA | 0  | 0  | 0  | 0  | Distal_pA.sICFI68-40-1.Shortened       |
| ATTT | -1 | -2 | 0  | 0  | Distal_pA.sICFI68-40-1.Lengthened      |
| CCAT | 2  | 2  | 0  | 0  | Distal_pA.sICFI68-40-1.Shortened       |
| CCAC | 2  | 2  | 0  | 0  | Proximal_pA.sIPABPM1-100-41.Shortened  |
| AGTA | -6 | -6 | 0  | 0  | Proximal_pA.sIPABPM1-100-41.Lengthened |
| CCAA | 4  | -1 | 0  | 0  | Proximal_pA.sIPABPM1-40-1.Shortened    |
| AAAA | 0  | 0  | 0  | 0  | Proximal_pA.sIPABPM1-40-1.Lengthened   |
| ATTS | -3 | -3 | 0  | 0  | Distal_pA.sIPABPM1-100-41.Shortened    |
| TTTT | 0  | 0  | 0  | 0  | Distal_pA.sIPABPM1-100-41.Lengthened   |
| TTTT | -1 | 0  | 1  | 3  | Distal_pA.sIPABPM1-40-1.Shortened      |
| ATTT | 1  | 1  | 0  | 0  | Distal_pA.sIPABPM1-40-1.Lengthened     |
| ACCC | 1  | 1  | 0  | 0  | Distal_pA.sIPABPM1-40-1.Shortened      |
| CCAT | -5 | 0  | 1  | 3  | Distal_pA.sIPABPM1-40-1.Lengthened     |
| GGCC | 1  | 0  | 0  | 0  | Proximal_pA.sIPABPM1-100-41.Shortened  |
| GGCC | 0  | 0  | 0  | 0  | Proximal_pA.sIPABPM1-100-41.Lengthened |
| GGCC | 0  | 0  | 0  | 0  | Proximal_pA.sIPABPM1-40-1.Shortened    |
| GGCC | 0  | 0  | 0  | 0  | Proximal_pA.sIPABPM1-40-1.Lengthened   |
| TTAT | 0  | 3  | 0  | 0  | Distal_pA.sIPABPM1-100-41.Shortened    |
| AAAT | -4 | -1 | 0  | 0  | Distal_pA.sIPABPM1-100-41.Lengthened   |
| GCCT | -1 | 0  | 0  | 0  | Distal_pA.sIPABPM1-40-1.Shortened      |
| ATAT | -3 | -2 | 0  | 0  | Distal_pA.sIPABPM1-40-1.Lengthened     |
| TTAA | 0  | 0  | 0  | 0  | Distal_pA.sIPABPM1-40-1.Shortened      |
| TGCC | 1  | 0  | 0  | 0  | Distal_pA.sIPABPM1-40-1.Lengthened     |
| CCAG | 0  | 1  | 0  | 0  | Distal_pA.sIPABPM1-40-1.Shortened      |
| CAGC | 0  | 0  | 0  | 0  | Distal_pA.sIPABPM1-40-1.Lengthened     |
| TTTG | 0  | 0  | 0  | 0  | Distal_pA.sIPABPM1-40-1.Shortened      |
| CTGG | 1  | 1  | -1 | 0  | Distal_pA.sIPABPM1-40-1.Lengthened     |
| GTTT | 0  | 0  | 0  | 0  | Distal_pA.sIPABPM1-40-1.Shortened      |
| TCCA | 0  | 0  | 0  | 0  | Distal_pA.sIPABPM1-40-1.Lengthened     |
| CTTC | 1  | 0  | 0  | 0  | Distal_pA.sIPABPM1-40-1.Shortened      |
| TATG | -2 | -1 | 0  | 0  | Distal_pA.sIPABPM1-40-1.Lengthened     |
| TAAT | -1 | -1 | 0  | 0  | Distal_pA.sIPABPM1-40-1.Shortened      |
| TATA | -3 | -1 | 0  | 0  | Distal_pA.sIPABPM1-40-1.Lengthened     |
| CTCA | 3  | 1  | 0  | 0  | Distal_pA.sIPABPM1-40-1.Shortened      |
| AGCC | 0  | 0  | 0  | 0  | Distal_pA.sIPABPM1-40-1.Lengthened     |
| CACC | 1  | 1  | 0  | 0  | Distal_pA.sIPABPM1-40-1.Shortened      |
| TCCT | 0  | 0  | 0  | 0  | Distal_pA.sIPABPM1-40-1.Lengthened     |
| GGGG | 0  | 0  | 0  | 0  | Distal_pA.sIPABPM1-40-1.Shortened      |
| ATTA | 0  | -1 | -2 | -1 | Distal_pA.sIPABPM1-40-1.Lengthened     |
| TTAG | 1  | 0  | 0  | 0  | Distal_pA.sIPABPM1-40-1.Shortened      |
| AAAC | 1  | 0  | -1 | 0  | Distal_pA.sIPABPM1-40-1.Lengthened     |
| TTCC | 1  | 0  | 0  | 0  | Distal_pA.sIPABPM1-40-1.Shortened      |
| GGGG | 0  | 0  | 0  | 0  | Distal_pA.sIPABPM1-40-1.Lengthened     |
| GGGG | 0  | 0  | 0  | 0  | Distal_pA.sIPABPM1-40-1.Shortened      |
| CTGA | 0  | 0  | 0  | 0  | Distal_pA.sIPABPM1-40-1.Lengthened     |
| GGGA | 0  | 0  | 0  | 0  | Distal_pA.sIPABPM1-40-1.Shortened      |
| GGGA | 0  | 0  | 0  | 0  | Distal_pA.sIPABPM1-40-1.Lengthened     |
| TCGG | 1  | 0  | 0  | 0  | Distal_pA.sIPABPM1-40-1.Shortened      |
| CACA | 1  | 0  | 0  | 0  | Distal_pA.sIPABPM1-40-1.Lengthened     |
| ACAG | 0  | 1  | 0  | 0  | Distal_pA.sIPABPM1-40-1.Shortened      |
| GGGG | 3  | 0  | 0  | 0  | Distal_pA.sIPABPM1-40-1.Lengthened     |
| GGCC | -2 | -1 | 0  | 0  | Distal_pA.sIPABPM1-40-1.Shortened      |
| AGCC | 0  | 0  | 1  | 0  | Distal_pA.sIPABPM1-40-1.Lengthened     |
| GACT | 1  | -1 | -1 | 0  | Distal_pA.sIPABPM1-40-1.Shortened      |
| GACC | 1  | 0  | -2 | -1 | Distal_pA.sIPABPM1-40-1.Lengthened     |
| ACCT | 3  | 2  | -1 | 0  | Distal_pA.sIPABPM1-40-1.Shortened      |
| GTAC | -2 | 0  | 1  | 0  | Distal_pA.sIPABPM1-40-1.Lengthened     |
| GGTG | 0  | 1  | 2  | 1  | Distal_pA.sIPABPM1-40-1.Shortened      |
| AAAC | 0  | 1  | -1 | -1 | Distal_pA.sIPABPM1-40-1.Lengthened     |
| GTGT | 0  | 0  | 0  | 0  | Distal_pA.sIPABPM1-40-1.Shortened      |
| CATC | 0  | 0  | 0  | 0  | Distal_pA.sIPABPM1-40-1.Lengthened     |
| CAAC | 1  | 0  | 0  | 0  | Distal_pA.sIPABPM1-40-1.Shortened      |
| GCTG | 1  | 0  | 0  | 0  | Distal_pA.sIPABPM1-40-1.Lengthened     |
| TTTT | 1  | 1  | 0  | 0  | Distal_pA.sIPABPM1-40-1.Shortened      |
| TTGA | -1 | -1 | 0  | 0  | Distal_pA.sIPABPM1-40-1.Lengthened     |
| GGCT | 1  | 0  | 1  | 0  | Distal_pA.sIPABPM1-40-1.Shortened      |
| AATG | -2 | -1 | 0  | 0  | Distal_pA.sIPABPM1-40-1.Lengthened     |
| ATAG | 0  | -1 | 0  | 0  | Distal_pA.sIPABPM1-40-1.Shortened      |
| TGGG | 0  | 0  | 0  | 0  | Distal_pA.sIPABPM1-40-1.Lengthened     |
| CGGC | 0  | 0  | 0  | 0  | Distal_pA.sIPABPM1-40-1.Shortened      |
| CTAG | 0  | 0  | 0  | 0  | Distal_pA.sIPABPM1-40-1.Lengthened     |
| GGAC | 0  | -1 | -1 | 0  | Distal_pA.sIPABPM1-40-1.Shortened      |
| CGCT | 1  | 0  | -1 | 0  | Distal_pA.sIPABPM1-40-1.Lengthened     |
| TCTA | -1 | 0  | -1 | 0  | Distal_pA.sIPABPM1-40-1.Shortened      |
| TGGA | 0  | 0  | 0  | 0  | Distal_pA.sIPABPM1-40-1.Lengthened     |
| GAGG | 1  | 1  | 0  | 0  | Distal_pA.sIPABPM1-40-1.Shortened      |
| GCTC | 1  | 1  | -2 | 0  | Distal_pA.sIPABPM1-40-1.Lengthened     |
| ACGA | 1  | 0  | 0  | 0  | Distal_pA.sIPABPM1-40-1.Shortened      |
| AACG | 0  | 0  | 0  | 0  | Distal_pA.sIPABPM1-40-1.Lengthened     |
| TCTC | 0  | 0  | 0  | 0  | Distal_pA.sIPABPM1-40-1.Shortened      |
| CGGA | 0  | 0  | 0  | 0  | Distal_pA.sIPABPM1-40-1.Lengthened     |
| CGCG | 0  | 0  | 0  | 0  | Distal_pA.sIPABPM1-40-1.Shortened      |
| TCAT | 1  | 0  | 0  | 0  | Distal_pA.sIPABPM1-40-1.Lengthened     |
| ACAT | -1 | -1 | 0  | 0  | Distal_pA.sIPABPM1-40-1.Shortened      |
| GTGC | 0  | 0  | 0  | 0  | Distal_pA.sIPABPM1-40-1.Lengthened     |
| ACCA | 0  | 0  | 0  | 0  | Distal_pA.sIPABPM1-40-1.Shortened      |
| ACAC | 0  | 0  | 0  | 0  | Distal_pA.sIPABPM1-40-1.Lengthened     |
