# Supplementary material for: Systematic Profiling of Poly(A)+ Transcripts Modulated by Core 3’ End Processing and Splicing Factors Reveals Regulatory Rules of Alternative Cleavage and Polyadenylation
Source: PLOS journal article supplement (doi:10.1371/journal.pgen.1005166), 2015-04-23
Supplement: S10 (10.1371/journal.pgen.1005166.s010) [file journal.pgen.1005166.s010]

**Gene groups shown in Fig. 7B**

|                    | 1   | 2   | 3   | 4   | 5   | 7   | 8   | 9   | 10  |                                                                                           |
|--------------------|-----|-----|-----|-----|-----|-----|-----|-----|-----|-------------------------------------------------------------------------------------------|
| Biological Process | 5.5 | 2.1 | 0.2 | 0.2 | 0.2 | 0.2 | 0.2 | 0.0 | 0.0 | regulation of phosphorylation                                                             |
|                    | 4.4 | 0.2 | 0.8 | 0.0 | 0.3 | 0.5 | 0.8 | 0.1 | 0.0 | cell death                                                                                |
|                    | 4.1 | 1.4 | 0.2 | 0.3 | 0.2 | 0.5 | 0.3 | 0.3 | 0.0 | intracellular signal transduction                                                         |
|                    | 0.3 | 0.0 | 0.1 | 0.3 | 0.2 | 0.0 | 0.0 | 3.9 | 0.1 | adaptive immune response based on somatic recombination of immune receptors built from... |
|                    | 3.5 | 0.6 | 0.2 | 0.2 | 0.0 | 0.2 | 0.0 | 0.3 | 0.0 | actin polymerization or depolymerization                                                  |
|                    | 0.6 | 0.4 | 3.5 | 0.2 | 0.1 | 0.2 | 0.2 | 0.3 | 0.0 | single-organism membrane organization                                                     |
|                    | 0.2 | 0.2 | 3.5 | 0.1 | 0.5 | 0.0 | 0.9 | 0.3 | 0.0 | spermatogenesis                                                                           |
|                    | 3.3 | 0.7 | 0.2 | 0.0 | 0.0 | 0.0 | 0.0 | 0.1 | 0.0 | retina development in camera-type eye                                                     |
|                    | 0.0 | 3.3 | 0.0 | 0.0 | 0.0 | 0.0 | 0.8 | 0.0 | 0.1 | endosome to lysosome transport                                                            |
|                    | 3.2 | 0.0 | 0.4 | 0.2 | 0.2 | 0.2 | 0.0 | 0.3 | 0.3 | steroid metabolic process                                                                 |
|                    | 0.3 | 0.1 | 0.0 | 1.1 | 0.1 | 3.2 | 0.1 | 0.3 | 0.2 | cellular carbohydrate metabolic process                                                   |
|                    | 0.2 | 3.1 | 0.6 | 0.0 | 0.0 | 0.2 | 0.3 | 0.1 | 0.0 | transforming growth factor beta receptor signaling pathway                                |
|                    | 0.2 | 3.1 | 0.5 | 0.0 | 0.1 | 0.2 | 0.3 | 0.0 | 0.0 | cellular response to endogenous stimulus                                                  |
|                    | 1.2 | 0.0 | 0.4 | 0.2 | 0.8 | 0.1 | 3.1 | 0.6 | 0.1 | oxidation-reduction process                                                               |
|                    | 0.3 | 0.0 | 3.0 | 0.0 | 0.2 | 0.0 | 0.0 | 0.0 | 0.3 | actomyosin structure organization                                                         |
|                    | 3.0 | 0.6 | 0.3 | 0.0 | 0.2 | 0.5 | 0.0 | 0.0 | 0.0 | cell fate specification                                                                   |
|                    | 0.3 | 0.2 | 3.0 | 0.2 | 0.5 | 0.6 | 0.3 | 0.1 | 0.0 | intracellular protein transport                                                           |
|                    | 1.8 | 3.0 | 0.1 | 0.0 | 0.5 | 0.1 | 0.0 | 0.1 | 0.0 | regulation of cellular component movement                                                 |
| Cellular component | 0.9 | 4.9 | 0.4 | 0.3 | 0.2 | 0.4 | 0.1 | 0.2 | 0.0 | cell leading edge                                                                         |
|                    | 0.5 | 1.9 | 4.1 | 0.0 | 0.1 | 0.5 | 0.5 | 0.0 | 0.0 | cell body                                                                                 |
|                    | 2.8 | 0.0 | 0.6 | 0.1 | 0.2 | 0.0 | 0.6 | 3.9 | 0.0 | mitochondrial envelope                                                                    |
|                    | 0.0 | 3.7 | 0.0 | 0.0 | 0.3 | 0.4 | 0.0 | 0.0 | 0.0 | coated vesicle membrane                                                                   |
|                    | 0.2 | 0.2 | 0.1 | 0.0 | 0.0 | 0.0 | 3.6 | 0.2 | 0.2 | oxidoreductase complex                                                                    |
|                    | 0.6 | 1.8 | 3.5 | 0.1 | 0.1 | 0.2 | 0.4 | 0.0 | 0.0 | cytoplasmic vesicle                                                                       |
|                    | 0.7 | 3.5 | 0.3 | 0.1 | 0.1 | 0.2 | 0.2 | 0.2 | 0.0 | cell junction                                                                             |
|                    | 1.3 | 3.4 | 1.2 | 0.1 | 0.1 | 0.0 | 1.2 | 0.2 | 0.0 | endomembrane system                                                                       |
|                    | 0.1 | 0.2 | 0.6 | 0.3 | 3.1 | 0.0 | 0.0 | 0.0 | 0.1 | catalytic step 2 spliceosome                                                              |
